# Supplementary material for: ATP‐induced conformational change of axonemal outer dynein arms revealed by cryo‐electron tomography
Source: PubMed Central journal article supplement (PMC10267688; doi:10.15252/embj.2022112466), 2023-04-13
Supplement: EMBJ-42-e112466-s001.pdf [file EMBJ-42-e112466-s001.pdf]

## Appendix Figures and Tables

For the manuscript

# ATP induced conformational change of axonemal outer dynein arms revealed by cryo-electron tomography

## Condensed title: ATP induced conformational change of ODA

Author:

Noemi Zimmermann<sup>1</sup>, Akira Noga<sup>1</sup>, Jagan Mohan Obbineni<sup>1,2</sup>, Takashi Ishikawa<sup>1</sup>

<sup>1</sup> Paul Scherrer Institut (PSI), Laboratory of Nanoscale Biology, CH-5232 Villigen PSI, Switzerland <sup>2</sup>VIT School for Agricultural Innovations and Advanced, Learning (VAIAL), VIT, Vellore, India

## Table of Contents

### Appendix Materials

| Contents                                                                               | page |
|----------------------------------------------------------------------------------------|------|
| <b>Appendix Figure S1</b> Different types of dyneins                                   | 2    |
| <b>Appendix Figure S2</b> Intra and inter ODA connection of the post-PS state.         | 3    |
| <b>Appendix Figure S3</b> Data processing of subtomogram averaging and classification. | 4    |
| <b>Appendix Table S1</b> PDB data used for fitting and model building in this work.    | 5    |
| <b>Appendix Table S2</b> Cryo-EM data collection statistics.                           | 6    |
| <b>Appendix Table S3</b> CC values between PDB structures and cryo-ET maps.            | 7    |

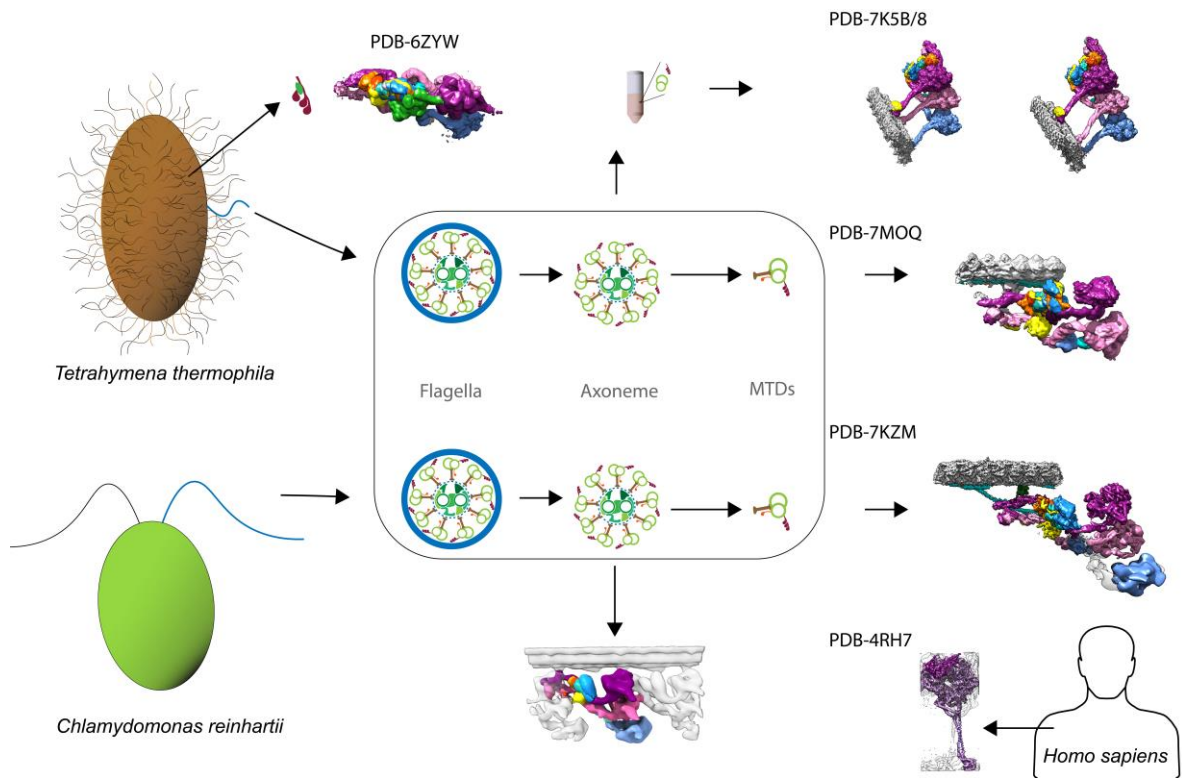

Appendix Figure S1 Different types of dyneins solved by crystallography (PDB-4RH7), cryo-EM (PDB-6ZYW, 7K5B/8, 7MOQ, 7KZM) and cryo-ET of *Tetrahymena* and *Chlamydomonas*. Axonemal dynein were solved packed by Shulin (PDB-6ZYW) and assembled on the A-tubule (PDB-7MOQ, 7KZM) or the B-tubule (PDB-7K5B/8).

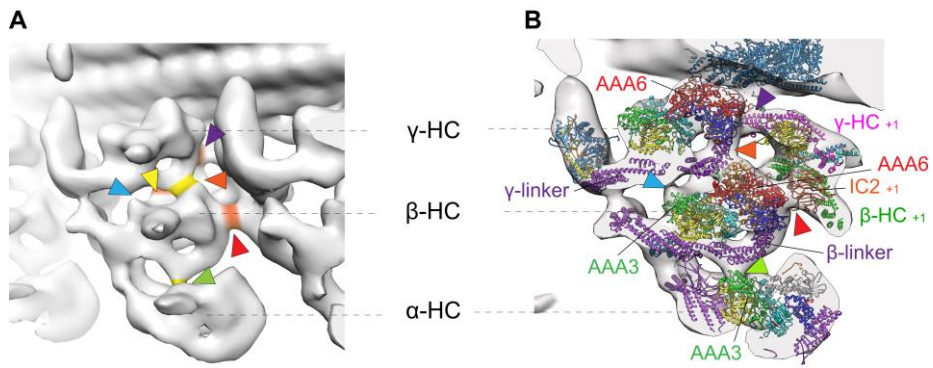

Appendix Figure S2 Intra and inter ODA connection of the post-PS state.

A) The intra- (orange) and inter-ODA (yellow) connections are highlighted.

B) Real space refined post-PS model fitted into the same view of A to indicate which proteins are involved in the inter- and intra-ODA connections. The following interactions are marked by arrow heads: purple- $\gamma$  AAA6 to proximal  $\gamma$  tail, orange and light blue -  $\gamma$  linker to  $\beta$  head, yellow- $\beta$  head to proximal NND, red- $\beta$  head to proximal IC2, green -  $\beta$  linker to  $\alpha$  head.

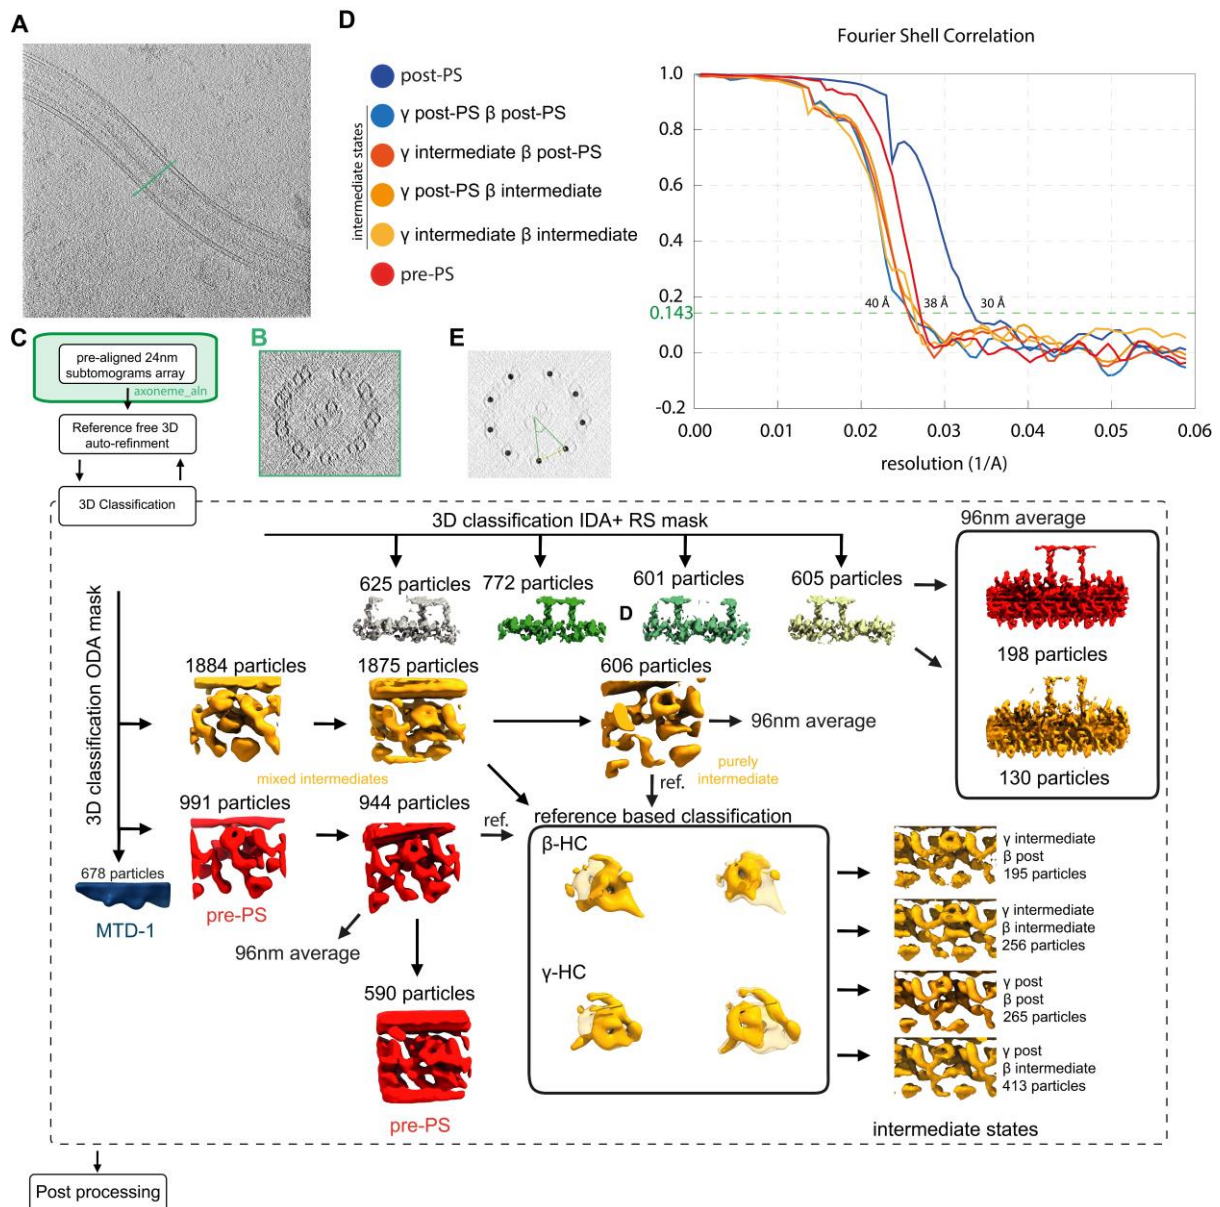

Appendix Figure S3 Data processing of subtomogram averaging and classification.

A-B) Slice through a tomogram of an axoneme (A) and a cross-section (B) indicated in green.

C) Pipeline of cryo-ET data processing. Two main software, *axoneme\_align* and RELION were used. The workflow of RELION 3D classification with pre-aligned 24nm subtomograms as an input shows that the data processing was split into two parts, IDA and radial spoke classification and ODA classification. Recombination of these two information lead to 96nm subtomogram average. The intermediate state with 1875 particles was further classified by a reference based classification, where a purely intermediate, post-PS and pre-PS conformation served as references.

D) Post-processing of the 24nm subtomogram average lead to a FSC of 30Å for post-PS and 38Å for pre-PS and 38-40 Å for the four intermediate states.

E) Schematics on how the distance and angle between two neighboring subtomograms were calculated.

Appendix Table S1. PDB data used for fitting and model building in this work.

| PDB ID | reference      | Image of the model/structure                                                        | Specimen                                              | Nucleotide condition | Method of structure determination |
|--------|----------------|-------------------------------------------------------------------------------------|-------------------------------------------------------|----------------------|-----------------------------------|
| 7KZM   | Walton et al.  | 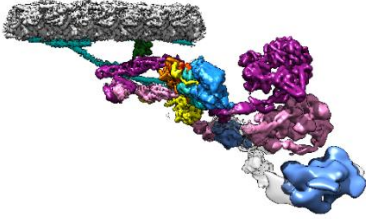   | <i>Chlamydomonas</i> ODA anchored on A-tubule         | No nucleotide        | SPA                               |
| 7MOQ   | Kubo et al.    |    | <i>Tetrahymena</i> ODA anchored on A-tubule           | No nucleotide        | SPA                               |
| 7K5b   | Rao et al.     |   | <i>Tetrahymena</i> ODA isolated and bound on B-tubule | No nucleotide        | SPA                               |
| 7K58   | Rao et al.     |  | <i>Tetrahymena</i> ODA isolated and bound on B-tubule | No nucleotide        | SPA                               |
| 6ZYW   | Mali et al.    |  | <i>Tetrahymena</i> ODA during IFT                     | ATP                  | SPA                               |
| 4RH7   | Schmidt et al. |  | <i>Homo sapiens</i> pre-power stroke dynein           | ATP-VO <sub>4</sub>  | crystallography                   |

Appendix Table S2. Cryo-EM data collection statistics.

|                                                           | WT (apo)        | WT ATP            |                            |
|-----------------------------------------------------------|-----------------|-------------------|----------------------------|
|                                                           |                 | Pre subpopulation | Intermediate subpopulation |
| Data collection and processing                            |                 |                   |                            |
| Microscope                                                | Titan Krios     | Titan Krios       |                            |
| Camera                                                    | Gatan K2 Summit | Gatan K2 Summit   |                            |
| Magnification                                             | 53000x          | 33000x            |                            |
| Voltage (kV)                                              | 300             | 300               |                            |
| Number of frames per images                               | 21              | 5                 |                            |
| Total electron exposure (e <sup>-</sup> /Å <sup>2</sup> ) | 80              | 80                |                            |
| Defocus range                                             | 3-4             | 4-5               |                            |
| Pixel size binned                                         | 8.49            | 8.5               |                            |
| Box size                                                  | 74              | 74                |                            |
| Initial particle images                                   | 3167            | 3553              |                            |
| Tomograms used                                            | 8               | 12                |                            |
| Final particle images                                     | 2131            | 590               | 195,256,265,413            |
| Map resolution (0.143 FS threshold)                       | 30 Å            | 38 Å              | 39 Å, 40 Å, 38 Å, 40 Å     |
| EMDB                                                      | EMD-16312       | EMD-16304         | EMD-16310, EMD-16309       |

Appendix Table S3. CC values between PDB structures and cryo-ET maps.

| Post-PS conformations |                               |                        |                              |
|-----------------------|-------------------------------|------------------------|------------------------------|
|                       | Original PDB model            | Protofilaments removed | Modified PDB model           |
| 7KZM                  | 0.8079                        | 0.7454                 | 0.7747*/0.8047**             |
| 7MOQ                  | 0.8505                        | 0.8                    | -                            |
| 7K58                  | 0.7701                        | 0.6562                 | -                            |
| 7K5B                  | 0.6797                        | 0.6797                 | 0.8422 (MTBS3)               |
| Pre-PS conformations  |                               |                        |                              |
|                       | Original post-PS conformation |                        | Modified pre-PS conformation |
| Post tail complex     | 0.8382                        | Pre tail complex       | 0.8443                       |

\*  $\gamma$  dynein head shift      \*\*  $\gamma$  and  $\alpha$ dynein head shift
